# Supplementary material for: Near-infrared Sr7NaGa(PO4)6:Cr3+,Ln3+ (Ln = Nd, Er, and Yb) phosphors with different energy transfer paths: photoluminescence enhancement and versatility
Source: Royal Society of Chemistry journal article supplement (doi:10.1039/d2tc05502c), 2023-01-01
Supplement: d2tc05502c1.pdf [file d2tc05502c1.pdf]

# Near-Infrared $\text{Sr}_7\text{NaGa}(\text{PO}_4)_6:\text{Cr}^{3+},\text{Ln}^{3+}$ (Ln = Nd, Er, Yb) Phosphors with Different Energy Transfer Paths: Photoluminescence Enhancement and Versatility

*Chuansheng Zhong<sup>a,b</sup>, Yonghui Xu<sup>a,b</sup>, Xiudi Wu<sup>a,b</sup>, Shuwen Yin<sup>a</sup>, Xibao Zhang<sup>a,b</sup>, liang Zhou<sup>a,b,c\*</sup>, and*

*Hongpeng You<sup>a,b,c\*</sup>*

a State Key Laboratory of Rare Earth Resource Utilization, Changchun Institute of Applied Chemistry, Chinese

Academy of Sciences, Changchun 130022, P. R. China

b University of Science and Technology of China, Hefei 230026, P. R. China

c Ganjiang Innovation Academy, Chinese Academy of Sciences, Ganzhou 341000, China

\*Corresponding author. Fax: +86 431 85698041.

E-mail address: [zhoul@ciac.ac.cn](mailto:zhoul@ciac.ac.cn) ( L. Zhou) and [hpyou@ciac.ac.cn](mailto:hpyou@ciac.ac.cn) (H.P. You)

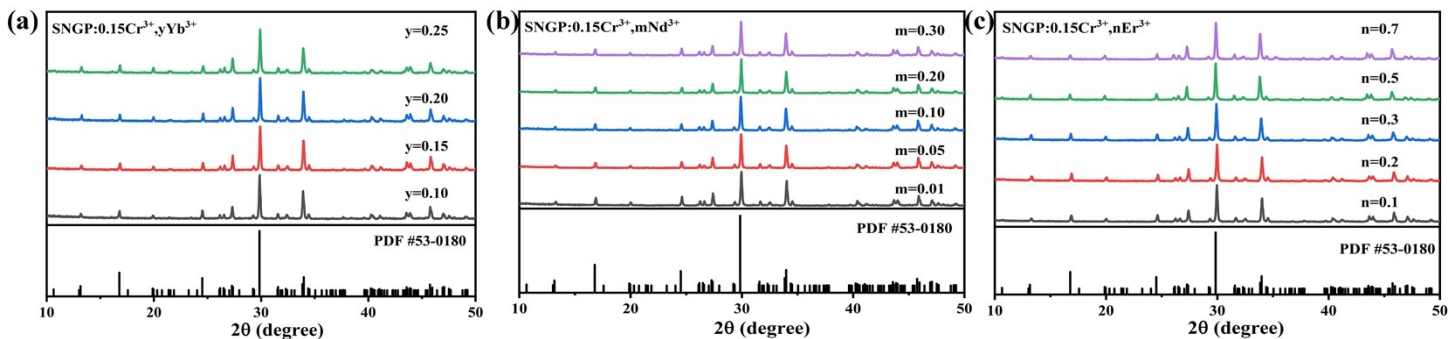

Figure S1: XRD patterns of SNGP:0.15Cr<sup>3+</sup>,yYb<sup>3+</sup> ( $y = 0.10, 0.15, 0.20, 0.25$ ), SNGP:0.15Cr<sup>3+</sup>,mNd<sup>3+</sup> ( $m = 0.01, 0.05, 0.10, 0.20, 0.30$ ) and SNGP:0.15Cr<sup>3+</sup>,nEr<sup>3+</sup> ( $n = 0.1, 0.2, 0.3, 0.5, 0.7$ ).

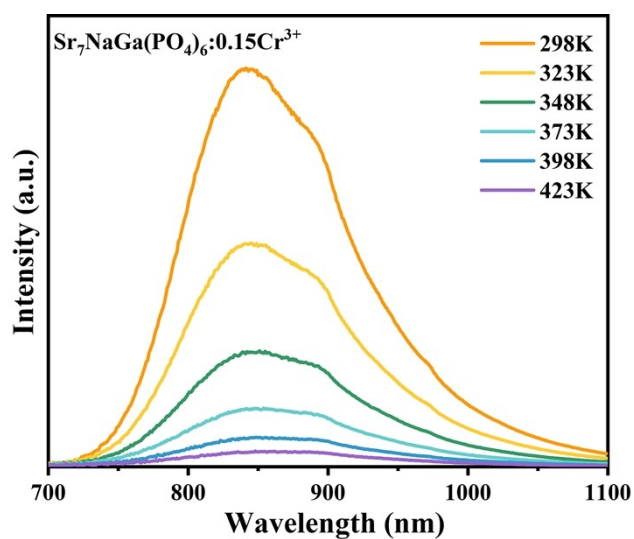

Figure S2. The PL spectra of SNGP:0.15Cr<sup>3+</sup> at different temperatures.

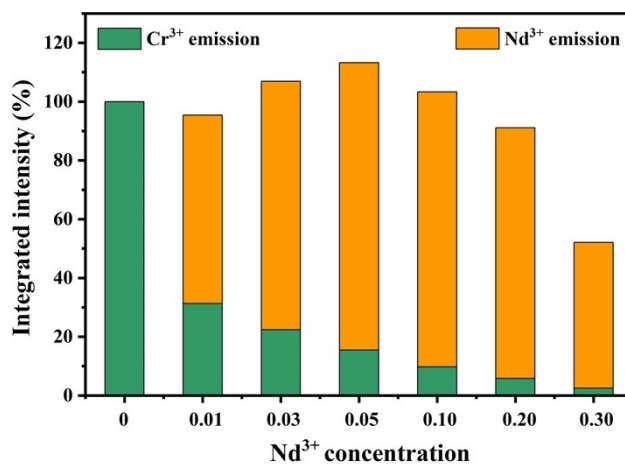

Figure S3. Integrated intensities of the total emission, Cr<sup>3+</sup>-emission, and Nd<sup>3+</sup>-emission in SNGP:0.15Cr<sup>3+</sup>,*m*Nd<sup>3+</sup> phosphors with various Nd<sup>3+</sup>-concentrations. The total emission is the sum of the Cr<sup>3+</sup>-emission and Nd<sup>3+</sup>-emission.

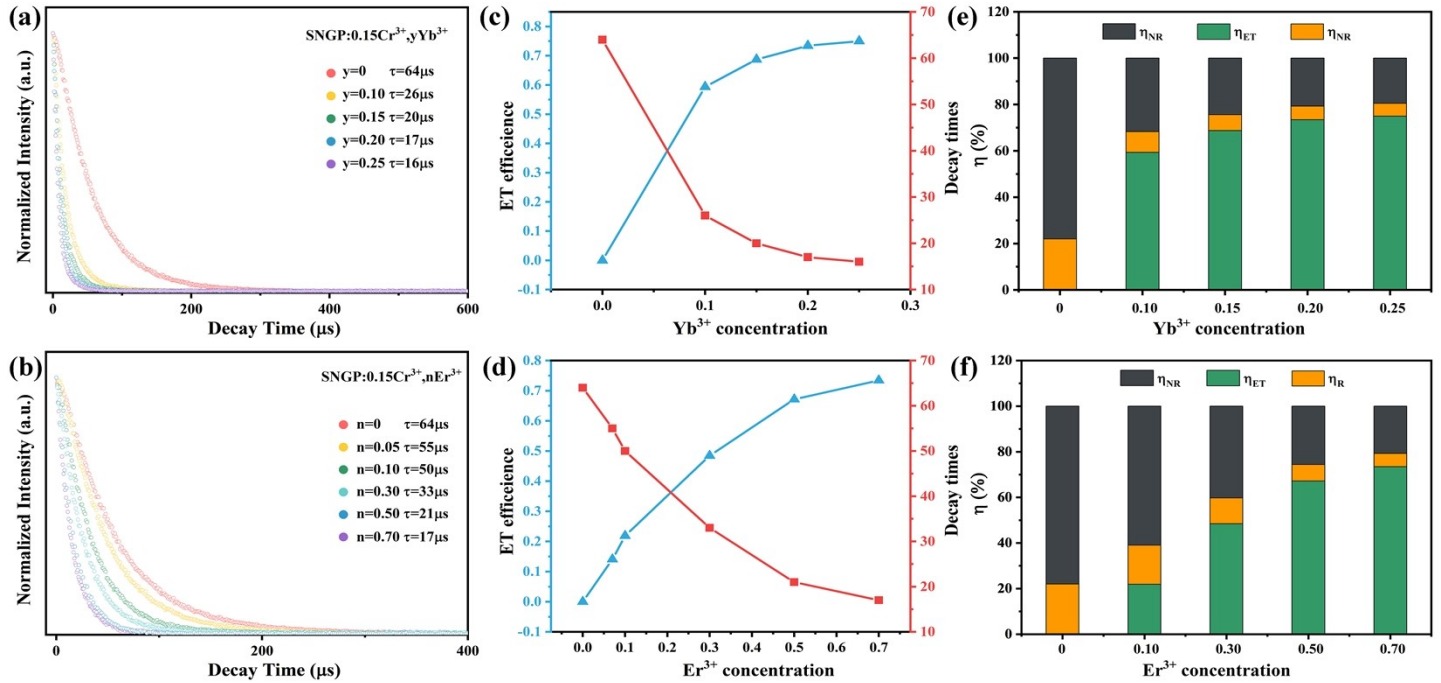

Figure S4 (a) Decay curves of Cr<sup>3+</sup> (a) in the SNGP:0.15Cr<sup>3+</sup>,*y*Yb<sup>3+</sup>, and (b) in the SNGP:0.15Cr<sup>3+</sup>,*n*Er<sup>3+</sup>; The values of energy transfer efficiency (η) and decay times of (c) Cr<sup>3+</sup>→Yb<sup>3+</sup> at various Yb<sup>3+</sup>-concentration, and (d) Cr<sup>3+</sup>→Er<sup>3+</sup> at various Er<sup>3+</sup>-concentration; Values of η<sub>ET</sub>, η<sub>R</sub>, and η<sub>NR</sub> of (e) SNGP:0.15Cr<sup>3+</sup>,*y*Yb<sup>3+</sup>, and SNGP:0.15Cr<sup>3+</sup>,*n*Er<sup>3+</sup>.

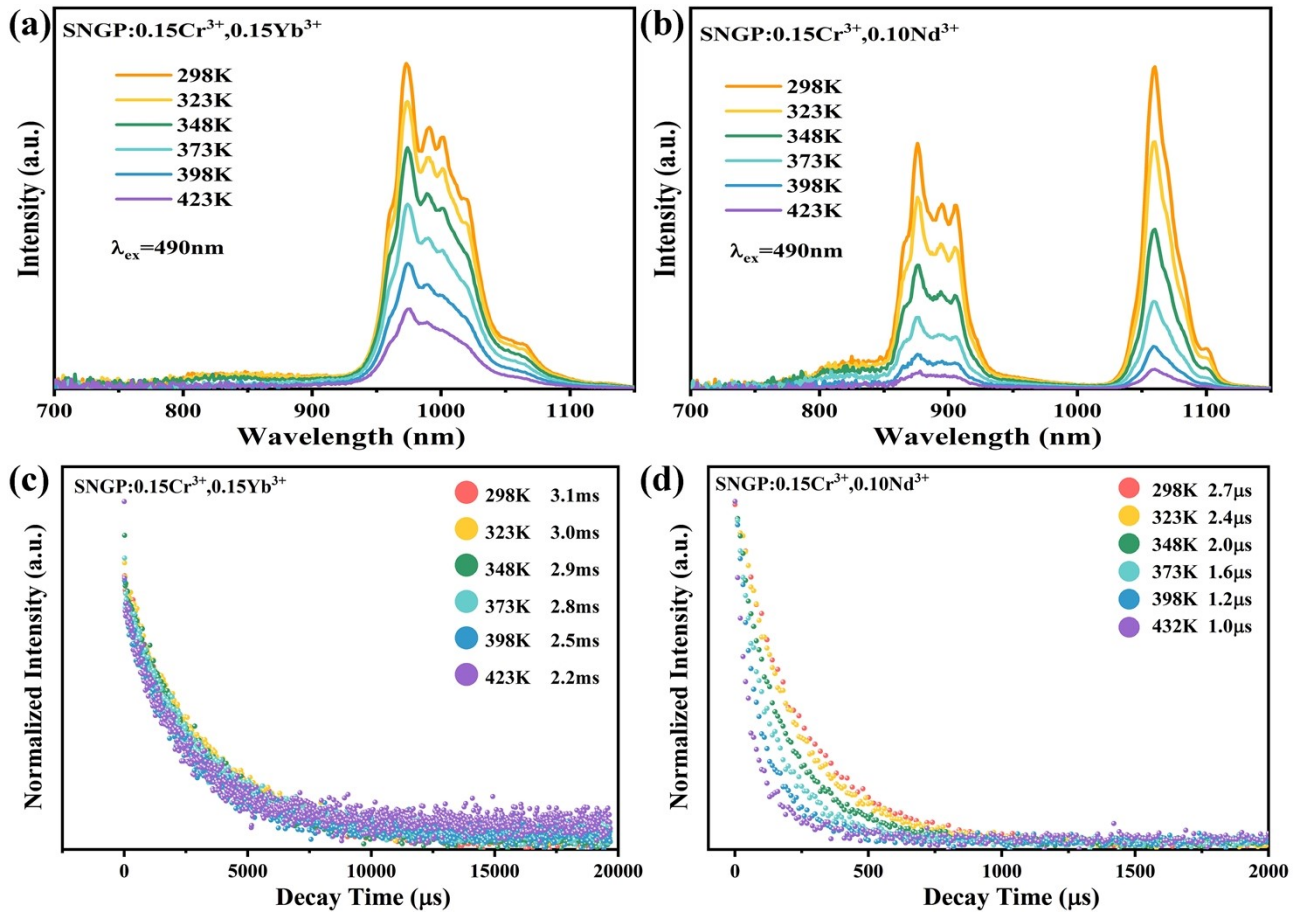

Figure S5, The PL spectra of (a) SNGP:0.15Cr<sup>3+</sup>,0.15Yb<sup>3+</sup>, and (b) SNGP:0.15Cr<sup>3+</sup>,0.10Nd<sup>3+</sup> at different temperatures., The decay curves of (c) SNGP:0.15Cr<sup>3+</sup>,0.15Yb<sup>3+</sup>, and (d) SNGP:0.15Cr<sup>3+</sup>,0.10Nd<sup>3+</sup> at different temperatures.

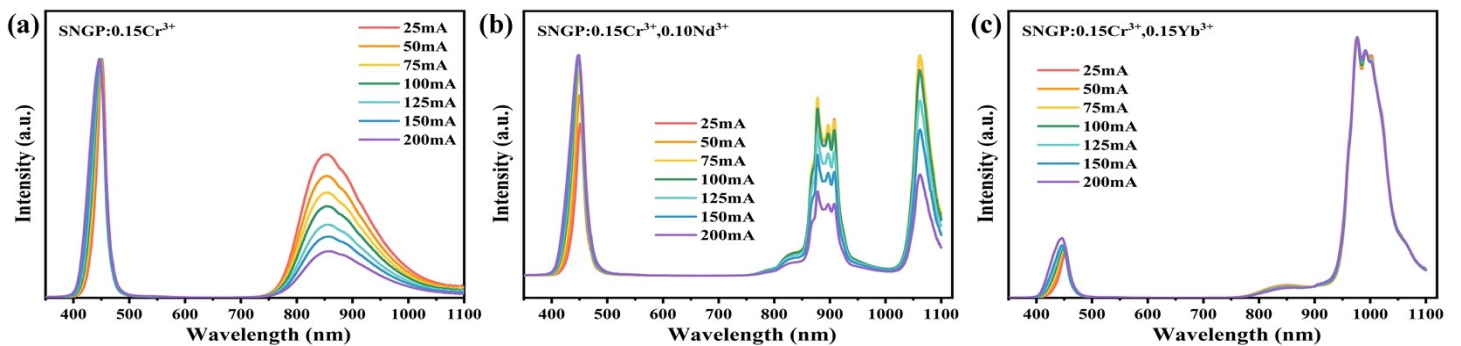

Figure S6, The electroluminescence spectra of (a) SNGP:0.15Cr<sup>3+</sup>, (b) SNGP:0.15Cr<sup>3+</sup>,0.10Nd<sup>3+</sup>, and (c) SNGP:0.15Cr<sup>3+</sup>,0.15Yb<sup>3+</sup> at different driving currents.

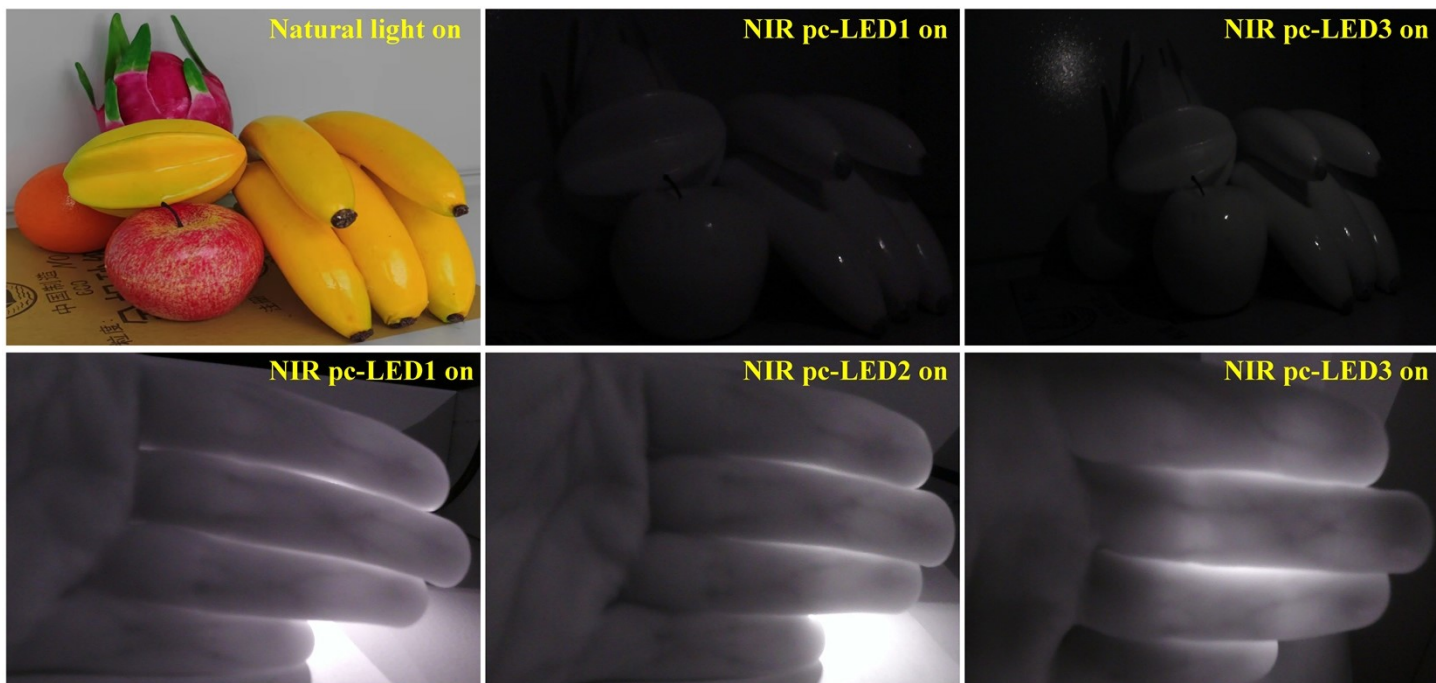

Figure S7 The fruit imagines under the natural light, NIR pc-LEDs 1-3 light. And the fingers under the NIR pc-LEDs 1-3 light.

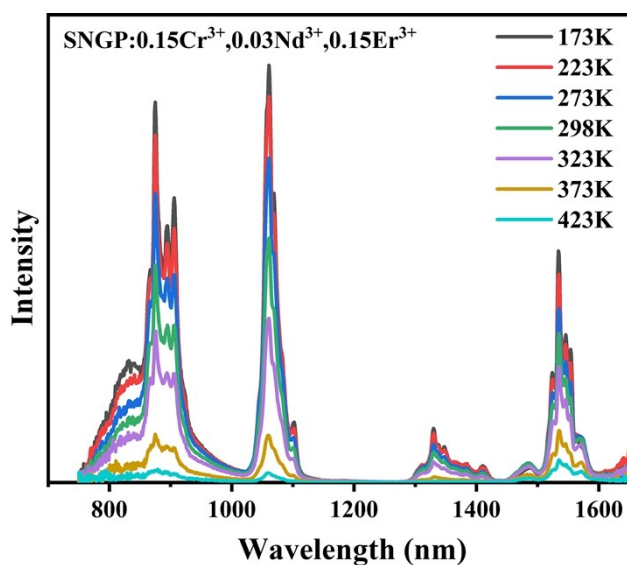

Figure S8 The PL spectra of SNGP:0.15Cr<sup>3+</sup>,0.03Nd<sup>3+</sup>,0.15Er<sup>3+</sup> at different temperatures.

Table S1 Refined distances of Cr<sup>3+</sup> and Ln<sup>3+</sup> corresponding to SNGP:0.15Cr<sup>3+</sup>,0.30Nd<sup>3+</sup>, SNGP:0.15Cr<sup>3+</sup>,0.70Er<sup>3+</sup> and SNGP:0.15Cr<sup>3+</sup>,0.25Yb<sup>3+</sup> phosphors

| Name | Distance (Å) | Average Distance (Å) |
|------|--------------|----------------------|
|------|--------------|----------------------|

|        |       |       |
|--------|-------|-------|
| Nd1_Cr | 5.295 | 4.538 |
| Nd2_Cr | 3.781 |       |
| Er1_Cr | 5.338 | 4.157 |
| Er2_Cr | 3.806 |       |
| Er3_Cr | 3.746 |       |
| Er4_Cr | 3.738 |       |
| Yb1_Cr | 5.324 | 4.151 |
| Yb2_Cr | 3.800 |       |
| Yb3_Cr | 3.744 |       |
| Yb4_Cr | 3.736 |       |

#### Supplementary Note1

When the critical distance exceeds 5 Å, the energy transfer mechanism belongs to multipolar interaction. The multipolar interaction type is calculated by the following equation:<sup>1</sup>

$$\log \left( \frac{I}{x} \right) = A - \left( \frac{\theta}{3} \right) \log x$$

Where x is the concentration of Cr<sup>3+</sup>, and A is a constant. Van Uitert defined  $\theta = 6, 8, 10$  as corresponding to dipole–dipole, dipole–quadrupole, and quadrupole–quadrupole interactions, respectively. As shown in Figure S9, the slop is -1.72, thus the  $\theta$  is similar to 6 and the multipolar interaction belongs to d-d interaction.

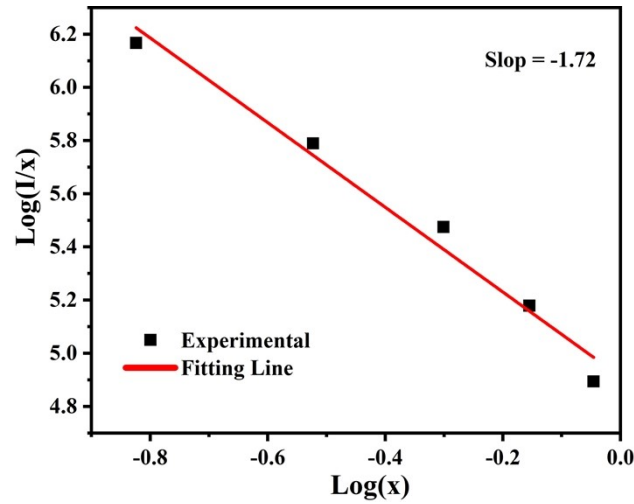

Figure S9 Dependence of  $\log(I/x)$  versus  $\log x$  for SNGP: $x\text{Cr}^{3+}$ .

### Supplementary Note2

The IQEs of SNGP: $0.15\text{Cr}^{3+}, 0.15\text{Yb}^{3+}$ , SNGP: $0.15\text{Cr}^{3+}, 0.10\text{Nd}^{3+}$  and SNGP: $0.15\text{Cr}^{3+}, 0.5\text{Er}^{3+}$  can be calculated

by the following formula:<sup>2</sup>

$$\eta_{IQE} = \frac{\int L_S}{\int E_R - \int E_S}$$

Where  $L_S$  represents the emission spectrum of sample,  $E_R$  and  $E_S$  relate to the excitation spectra of sample and  $\text{BaSO}_4$  reference, respectively. Notably, the PL spectrum exceeding 960 nm of the sample is not detected due to the instrument limitation, which caused the IQE of samples is lower than real IQE. The real IQE can be obtained

by the equation as follows:

$$\eta_r = \frac{\eta_{IQE} \times \int L'_S}{\int L_S} + \eta_{IQE}$$

Where  $\eta_r$  represents the real IQE of the sample,  $L'_S$  stands for the emission spectrum undetected by instrument.

## Reference

1. C. Zhong, L. Zhang, Y. Xu, X. Wu, S. Yin, X. Zhang and H. You, *J. Alloy. Compd.* , 2022, **903**, 163945.
2. S. Wang, H. Wu, Y. Fan, Q. Wang, T. Tan, R. Pang, S. Zhang, D. Li, L. Jiang, C. Li and H. Zhang, *Chem. Eng. J.*, 2022, **432**, 134265.
